# Supplementary material for: Affective and Engagement Issues in the Conception and Assessment of a Robot-Assisted Psychomotor Therapy for Persons with Dementia
Source: PubMed Central journal article supplement (PMC5491651; doi:10.3389/fpsyg.2017.00950), 2017-06-30
Supplement: Presentation1.pdf [file Presentation1.pdf]

## *Supplementary Material*

# Affective and engagement issues in the conception and assessment of a robot-assisted psychomotor therapy for persons with dementia

Natacha ROUAIX, Laure RETRU-CHAVASTEL, Anne-Sophie RIGAUD, Clotilde MONNET, Hermine LENOIR, Maribel PINO\*

\* Corresponding Author: [maribel.pino@aphp.fr](mailto:maribel.pino@aphp.fr)

### 1 Supplementary Figures

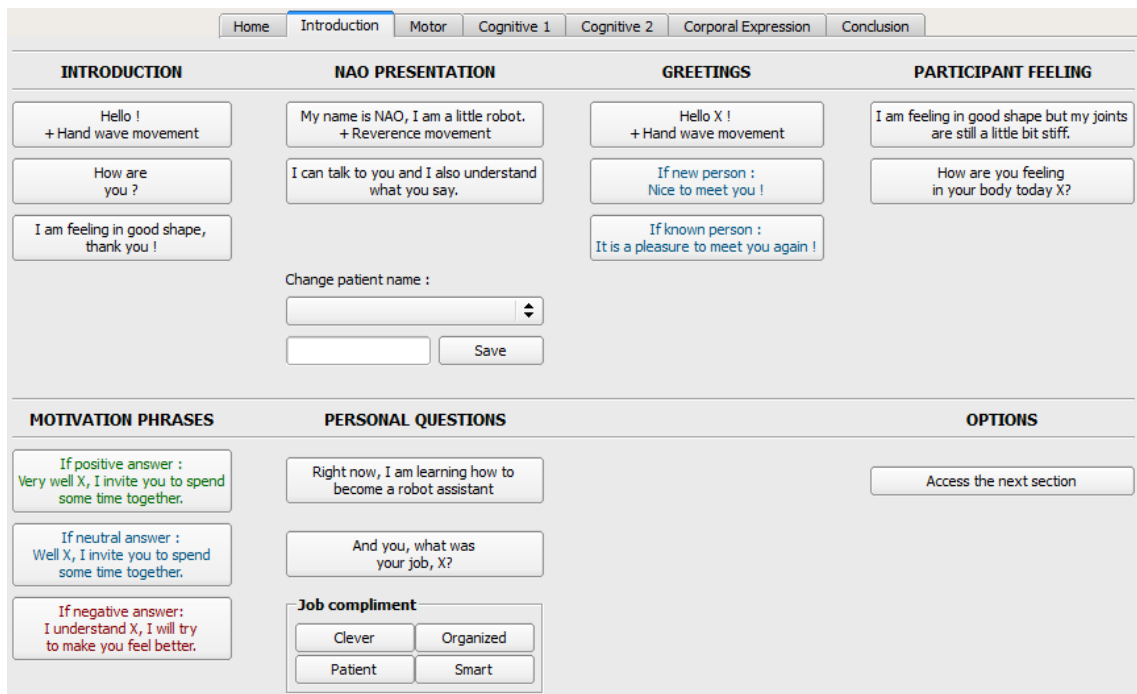

The screenshot displays a control interface for the 'Introduction' section of a robot-assisted therapy. At the top, there is a navigation bar with tabs: Home, Introduction (selected), Motor, Cognitive 1, Cognitive 2, Corporal Expression, and Conclusion. Below this, the interface is organized into several panels:

- INTRODUCTION:** Contains three buttons: 'Hello ! + Hand wave movement', 'How are you?', and 'I am feeling in good shape, thank you !'.
- NAO PRESENTATION:** Contains two buttons: 'My name is NAO, I am a little robot. + Reverence movement' and 'I can talk to you and I also understand what you say.' Below these is a 'Change patient name' section with a text input field, a dropdown arrow, and a 'Save' button.
- GREETINGS:** Contains three buttons: 'Hello X ! + Hand wave movement', 'If new person : Nice to meet you !', and 'If known person : It is a pleasure to meet you again !'.
- PARTICIPANT FEELING:** Contains two buttons: 'I am feeling in good shape but my joints are still a little bit stiff.' and 'How are you feeling in your body today X?'.
- MOTIVATION PHRASES:** Contains three buttons: 'If positive answer : Very well X, I invite you to spend some time together.', 'If neutral answer : Well X, I invite you to spend some time together.', and 'If negative answer: I understand X, I will try to make you feel better.'
- PERSONAL QUESTIONS:** Contains two buttons: 'Right now, I am learning how to become a robot assistant' and 'And you, what was your job, X?'. Below this is a 'Job compliment' section with four buttons: 'Clever', 'Organized', 'Patient', and 'Smart'.
- OPTIONS:** Contains one button: 'Access the next section'.

**Supplementary Figure 1.** Control interface “Introduction section”.

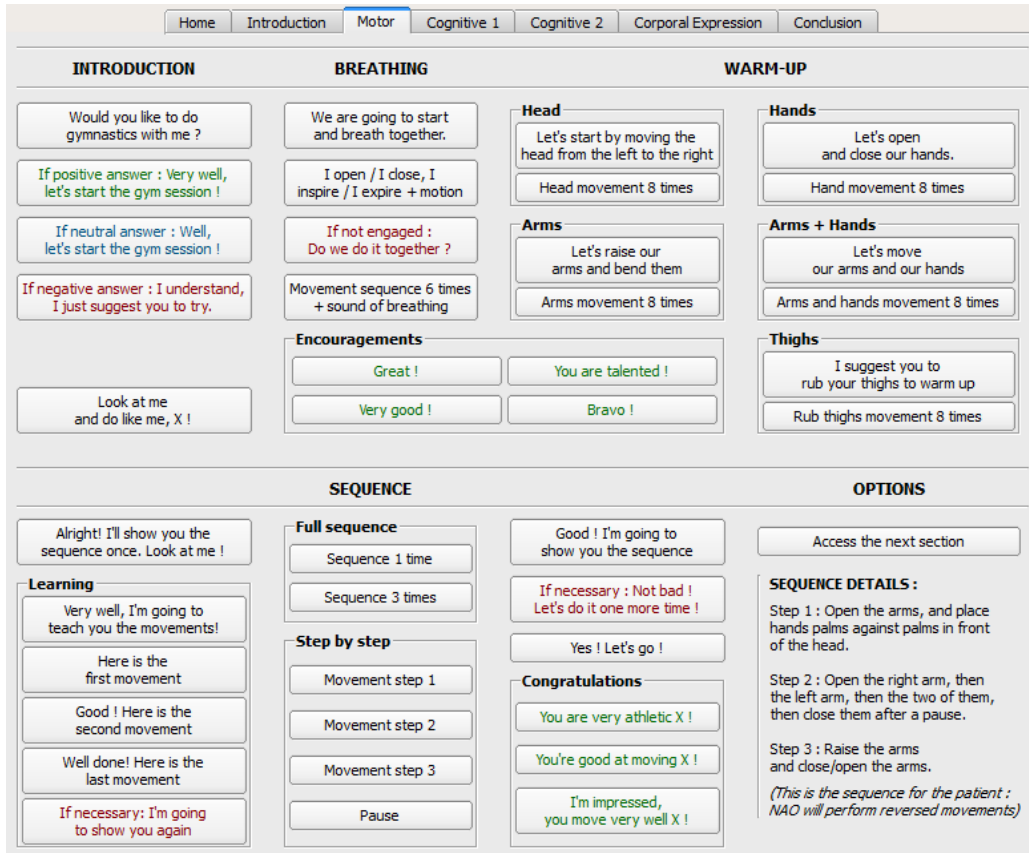

Supplementary Figure 2. Control interface “Motor section”.

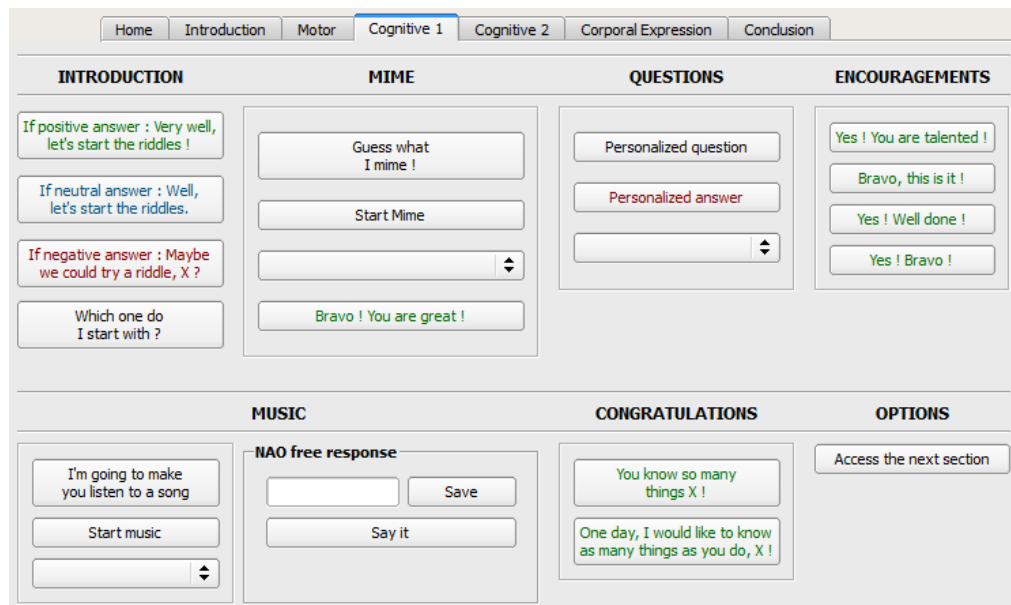

Supplementary Figure 3. Control interface “Cognitive stimulation section 1”.

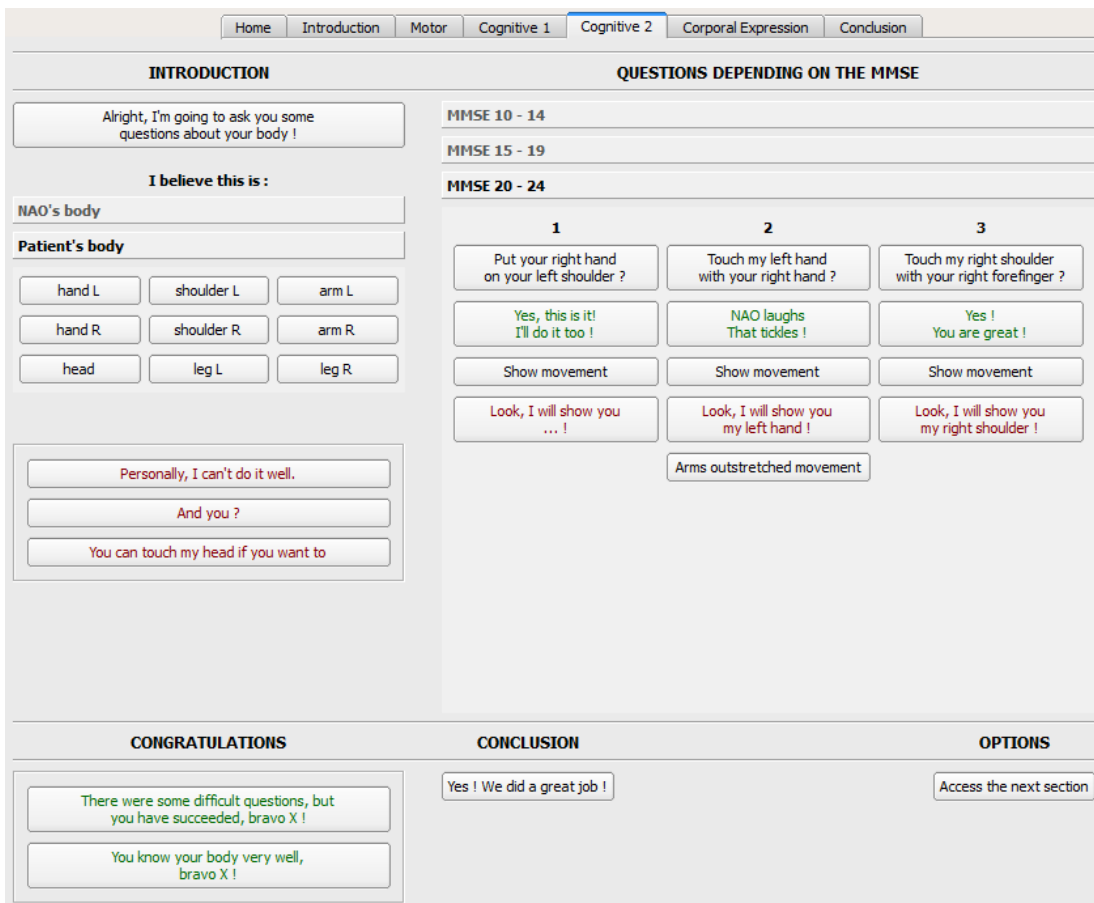

**Supplementary Figure 4.** Control interface “Cognitive stimulation section 2”.

Supplementary Figure 5. Control interface “Corporal expression”.

Supplementary Figure 6. Control interface “Conclusion section”.
